# Supplementary material for: The aquaporin 5 -1364A/C promoter polymorphism impacts on resolution of acute kidney injury in pneumonia evoked ARDS
Source: PubMed Central journal article supplement (PMC6281272; doi:10.1371/journal.pone.0208582), 2018-12-05

**S2 Figure. Proportion of all patients stratified for AKI stage 1, 2, and 3 according to KDIGO criteria. Measurements on day 1, 5, 10, 15, 20, 25, and 30.**

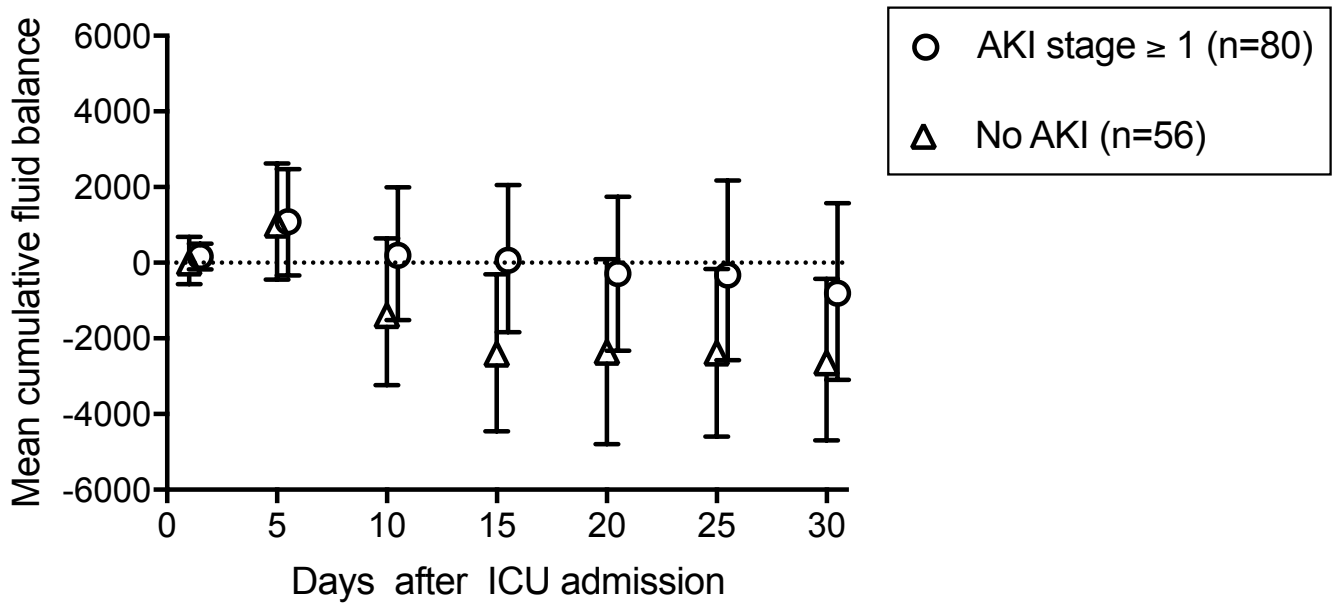

Supplement: pone.0208582.s001.pdf [file pone.0208582.s001.pdf]
